# Supplementary material for: Rift Valley Fever Virus Primes Immune Responses in Aedes aegypti Cells
Source: MDPI journal article supplement (doi:10.3390/pathogens12040563), 2023-04-06
Supplement: s1 [file s1]

Rift Valley fever virus primes immune responses in *Aedes aegypti* cells.

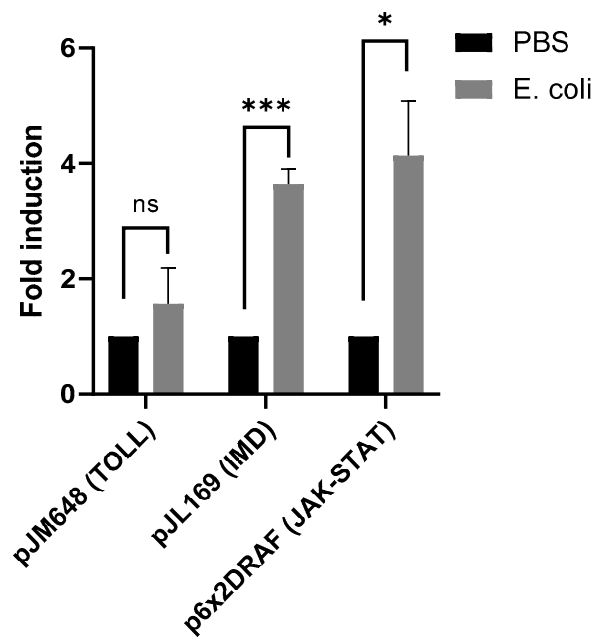

**Figure S1.** Immune signalling reporter assays in Aag2 cells show induction of IMD and JAK-STAT, but not Toll pathways in response to bacteria. Immune signalling reporter assays were performed by co-transfecting Aag2 cells with firefly luciferase (FLuc) expressing reporter plasmids pJM648 (Toll), pJL169 (IMD) or p6x2DRAF (JAK-STAT) and a *Renilla* luciferase (RLuc) plasmid as transfection normalization control. Cells were then treated with PBS as control or with heat-inactivated *E. coli*. Signalling activity was measured using a dual luciferase assay. FLuc measurements were normalized to RLuc measurements. Data is shown after subtraction of background luciferase levels and relative to PBS control. Bars represent means  $\pm$  SEM,  $n = 4$ . Statistical analyses were performed using Welch t-tests, assuming unequal variances.

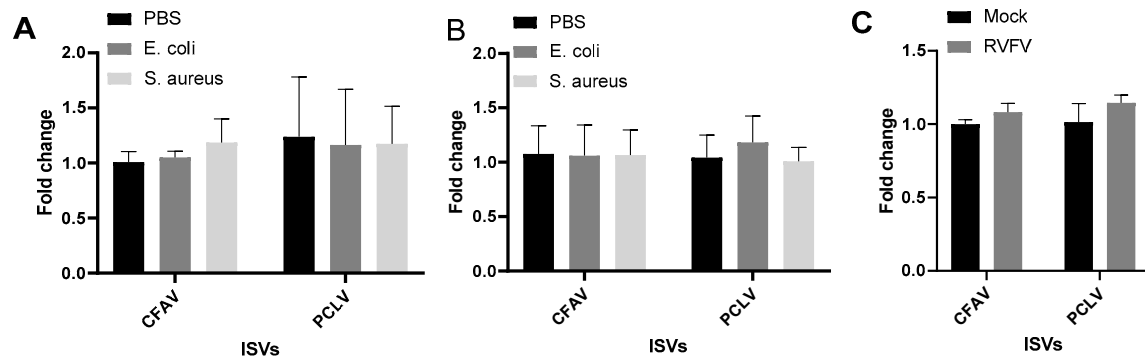

**Figure S2.** RNA levels of the insect-specific viruses CFAV and PCLPV are not regulated in Aag2 cells or Aag2-AF05 cells upon bacterial challenge, or by RVFV infection. **(A)** Aag2 cells were stimulated with heat-inactivated *E. coli* or *S. aureus* (prepared in-house), or were left unstimulated (PBS control) for 16 h, and RNA levels of CFAV and PCLPV were quantified by qRT-PCR. **(B)** AF05 cells were stimulated with commercial preparations of heat-killed *E. coli* or *S. aureus*, or were left unstimulated (PBS control) for 16 h, and RNA levels of CFAV and PCLPV were quantified by qRT-PCR. **(A)** and **(B)**: Bars represent mean gene expression fold changes in treated groups versus controls  $\pm$  SEM,  $n = 3$ . Statistical analyses were performed on  $\Delta\Delta C_t$  values using unpaired t-tests. **(C)** Aag2 cells were infected with RVFV rMP-12 at MOI 1 for 24 h, and RNA levels of CFAV and PCLPV were quantified by qRT-PCR. Bars represent mean expression fold changes in the RVFV-infected group versus the mock-infected group  $\pm$  SEM,  $n = 3$ . Statistical analyses were performed on  $\Delta\Delta C_t$  values using unpaired t-tests.

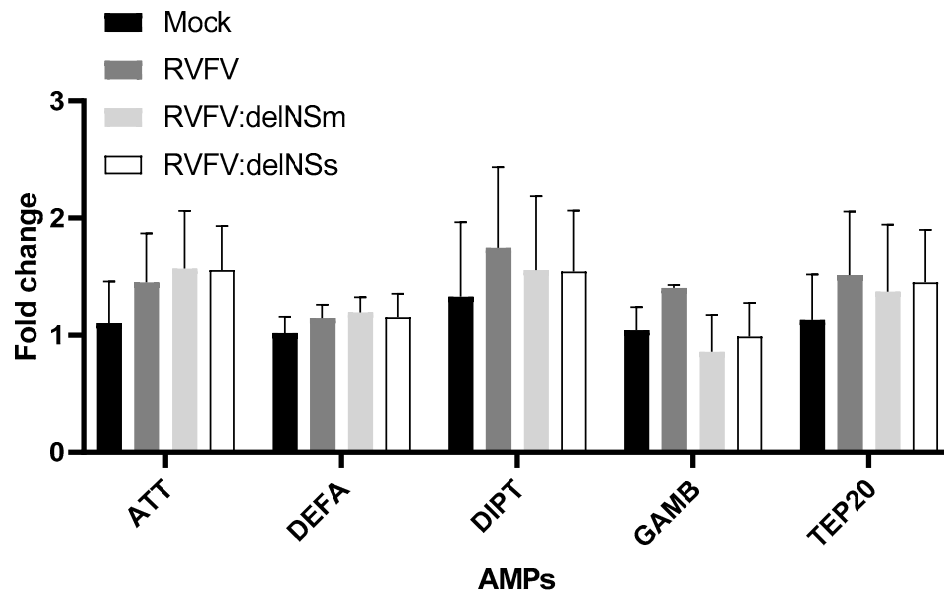

**Figure S3.** RVFV rMP-12 NSm and NSs proteins do not inhibit *AMP* gene expression following viral infection of Aag2 cells. Aag2 cells were mock-infected or infected with RVFV rMP-12, RVFV rMP12:delNSm or RVFV rMP-12:delNSs at MOI 1 for 24 h, and the induction of *AMPs* was quantified by qRT-PCR. Bars represent mean gene expression fold changes in the virus-infected groups versus the mock-infected group  $\pm$  SEM,  $n = 3$ . Statistical analyses were performed on  $\Delta\Delta C_t$  values using unpaired t-tests.

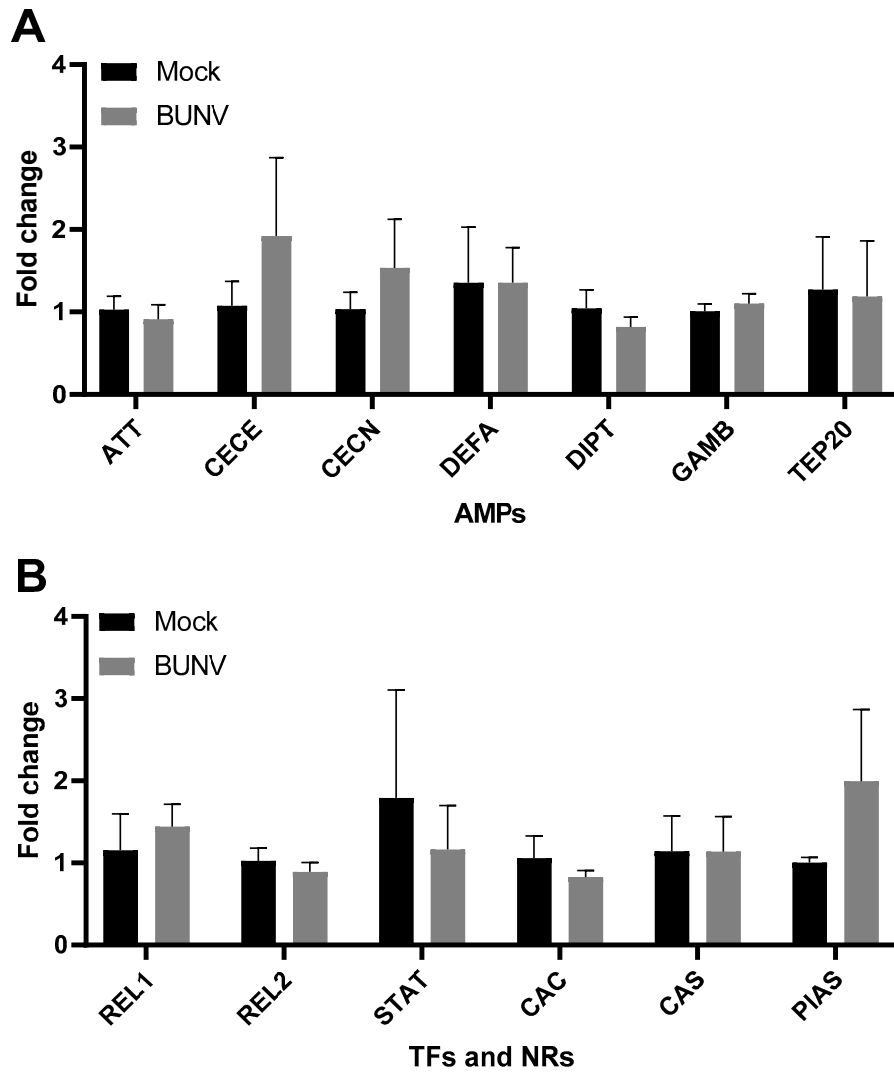

**Figure S4.** BUNV does not induce immune signalling in Aag2 cells. Aag2 cells were mock-infected or infected with rBUNV at MOI 1 for 24 h, and the induction of genes encoding (A) AMPs or (B) transcription factors (TFs) and negative regulators (NRs) was quantified by qRT-PCR. Bars represent mean gene expression fold changes in the BUNV-infected group versus the mock-infected group  $\pm$  SEM,  $n = 3$ . Statistical analyses were performed on  $\Delta\Delta C_t$  values using unpaired t-tests.

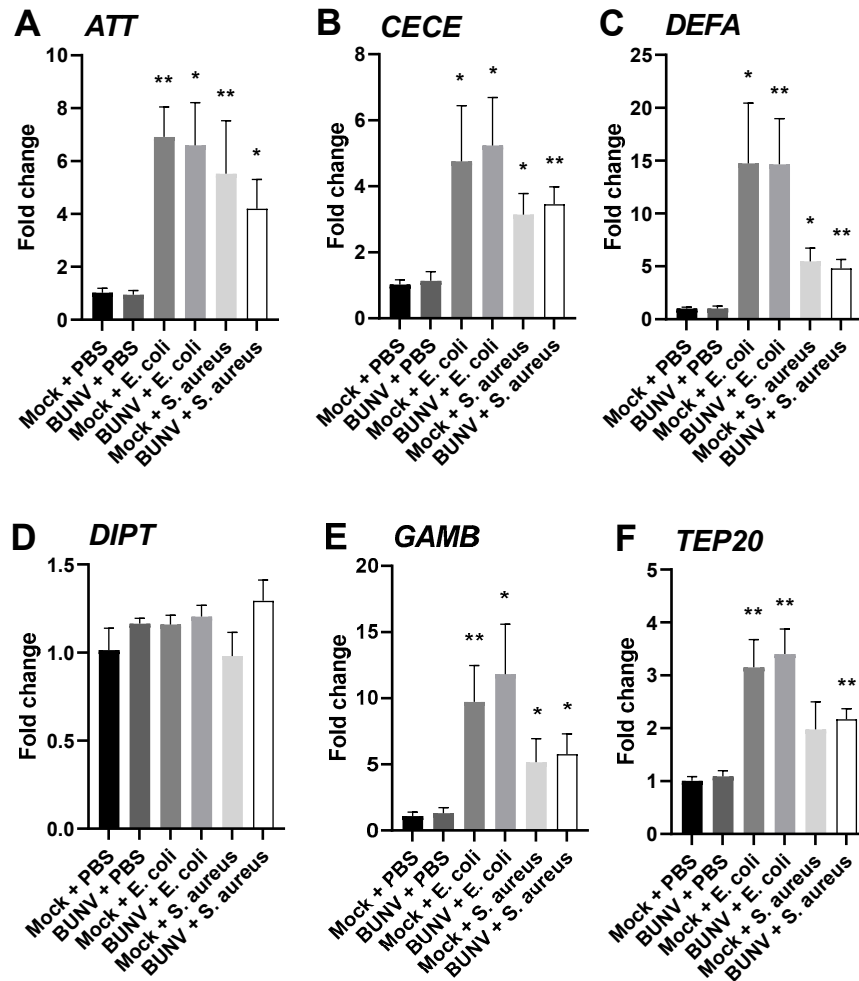

**Figure S5.** BUNV infection does not prime Aag2 cell immunity in response to bacteria. Aag2 cells were mock-infected or infected with rBUNV at MOI 1 for 24 h, followed by treatment of cells with heat-inactivated *E. coli*, heat-inactivated *S. aureus* or PBS as control for 16 h. The induction of AMPs was quantified by qRT-PCR. Bars represent means of gene expression fold changes in treated and/or infected groups versus the mock-infected, PBS-treated control group  $\pm$  SEM,  $n = 3$ . Statistical analyses were performed on  $\Delta\Delta C_t$  values either using Welch t-tests, assuming unequal variances when comparing bacteria-treated groups to the mock-infected, PBS-treated control group, or unpaired t-tests when comparing RBFV-infected, bacteria-treated groups to mock-infected, bacteria-treated groups. Asterisks represent significant differences between treated and/or infected groups and the mock-infected, PBS-treated control group.
